# Supplementary material for: Extraction and annotation of human mitochondrial genomes from 1000 Genomes Whole Exome Sequencing data
Source: PubMed Central journal article supplement (PMC4083402; doi:10.1186/1471-2164-15-s3-s2), 2014-05-06

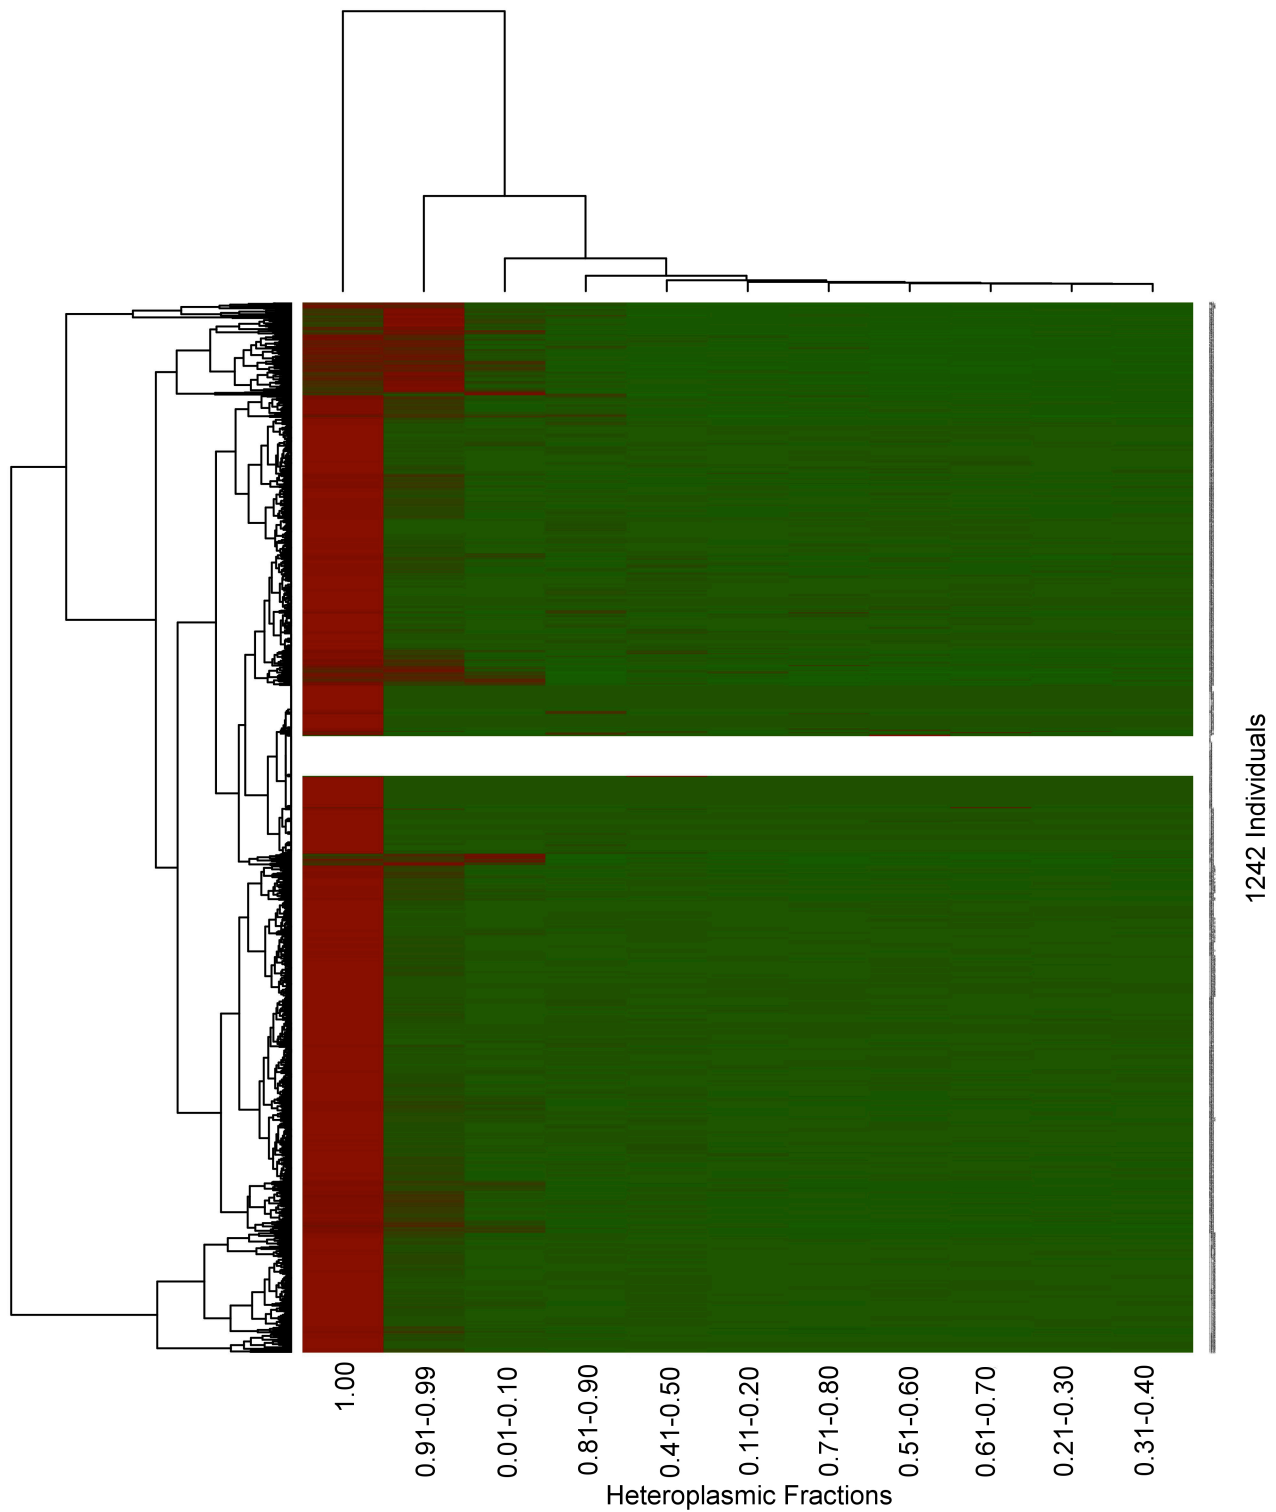

Supplement: 1471-2164-15-S3-S2-S10.pdf [file 1471-2164-15-S3-S2-S10.pdf]
